# Supplementary material for: Improving inclusion and well-being of trans and gender nonconforming collegiate student–athletes: foundational concepts from the National Collegiate Athletic Association Summit on Gender Identity and Student–Athlete Participation
Source: HighWire-hosted journal article supplement (doi:10.1136/bjsports-2022-106392), 2023-03-20
Supplement: bjsports-2022-106392supp001_data_supplement.pdf [file bjsports-2022-106392supp001_data_supplement.pdf]

**Supplementary Table 1.** Concepts that may improve inclusion and/or well-being for NCAA TGNC student-athletes- *Round 1 results* (n=34)

| Action                                                                                                                                                                                                                                                          | Utility<br>Mean (SD)<br>% $\geq 7$ | Feasibility<br>Mean (SD)<br>% $\geq 7$ |
|-----------------------------------------------------------------------------------------------------------------------------------------------------------------------------------------------------------------------------------------------------------------|------------------------------------|----------------------------------------|
| <b>Institutional actions</b>                                                                                                                                                                                                                                    |                                    |                                        |
| 1. Patient-centered healthcare for trans and gender nonconforming (TGNC) student-athletes, including key elements like understanding and respecting student-athlete identity, goals, and values, and having this guide a collaborative decision-making process. | 8.5 (1.5)<br>94%                   | 7.1 (2.1)<br>67%                       |
| 2. Identification of at least one licensed mental health provider to provide culturally sensitive care to TGNC athletes.                                                                                                                                        | 8.5 (1.5)<br>94%                   | 7.4 (1.9)<br>85%                       |
| 3. Dissemination, to student-athletes and staff, of a list of licensed mental health professionals within athletics, campus partners or the greater community available to provide culturally-sensitive care to TGNC student-athletes.                          | 8.8 (0.5)<br>100%                  | 8.2 (1.2)<br>85%                       |
| 4. Education specific to TGNC inclusion on a regular basis to stakeholder groups including: coaches, athletic department staff, sports medicine staff, and student-athletes.                                                                                    | 8.6 (1.2)<br>97%                   | 8.0 (1.5)<br>88%                       |
| 5. Regular review of educational methods/modalities to confirm that primary responsibility for educating others about TGNC issues is not being placed on TGNC student-athletes.                                                                                 | 8.5 (1.1)<br>91%                   | 7.8 (1.7)<br>79%                       |
| 6. Education that addresses the myths and misperceptions about TGNC athletes and various transition processes.                                                                                                                                                  | 8.4 (1.6)<br>94%                   | 8.2 (1.4)<br>88%                       |
| 7. Education that addresses the existence and impact of explicit and implicit biases.                                                                                                                                                                           | 8.2 (1.8)<br>88%                   | 8.2 (1.7)<br>91%                       |
| 8. Education that emphasizes shared humanity across gender identities.                                                                                                                                                                                          | 8.5 (1.1)<br>94%                   | 8.1 (1.2)<br>88%                       |
| 9. Education that shares concrete strategies for individuals to enhance TGNC inclusion (e.g., inclusive communication).                                                                                                                                         | 8.6 (1.0)<br>94%                   | 8.0 (1.5)<br>88%                       |
| 10. Education that includes a non-judgmental opportunity for participants to ask questions.                                                                                                                                                                     | 8.7 (0.7)<br>97%                   | 7.7 (1.4)<br>85%                       |
| 11. Differentiated education that is tailored for specific stakeholder roles and responsibilities (i.e., coaches, athletic department staff, sports medicine staff, student-athletes).                                                                          | 8.5 (1.1)<br>91%                   | 7.3 (1.7)<br>76%                       |
| 12. Institutional processes for student-athletes to select and update their pronouns by which to be referred.                                                                                                                                                   | 8.4 (1.6)<br>91%                   | 7.8 (1.9)<br>82%                       |
| 13. Communication of expectations that staff and others will openly use and support the use of selected pronouns in communications and record keeping.                                                                                                          | 8.6 (0.9)<br>94%                   | 8.2 (1.6)<br>85%                       |
| 14. Student-athletes options for gender-neutral uniforms, where possible pursuant to NCAA rules and policies.                                                                                                                                                   | 7.9 (1.8)<br>82%                   | 6.9 (2.2)<br>61%                       |
| 15. Institutional protocols that support awareness and appropriate use of student-athlete and staff pronouns by PA announcers/media broadcasters.                                                                                                               | 8.4 (1.5)<br>94%                   | 8.0 (1.6)<br>82%                       |

|                                                                                                                                                                                                                                                                                                                                                                                   |                  |                  |
|-----------------------------------------------------------------------------------------------------------------------------------------------------------------------------------------------------------------------------------------------------------------------------------------------------------------------------------------------------------------------------------|------------------|------------------|
| 16. Institutional practices that ensure availability of gender safe facilities (e.g., locker rooms, restrooms) for home and visiting teams.                                                                                                                                                                                                                                       | 8.4 (1.6)<br>94% | 6.5 (2.1)<br>55% |
| 17. Regular quality improvement review processes, guided by collection of feedback from TGNC student-athletes about TGNC resource availability, utilization, barriers to utilization, and unmet needs.                                                                                                                                                                            | 8.3 (1.8)<br>91% | 7.6 (2.0)<br>82% |
| NCAA (committee and governance) actions                                                                                                                                                                                                                                                                                                                                           |                  |                  |
| 18. Inclusion of TGNC concerns as part of the mitigation that may qualify a student-athlete for relief of NCAA eligibility restrictions (e.g. transfer, uniforms).                                                                                                                                                                                                                | 8.0 (1.9)<br>88% |                  |
| 19. Inclusion of gender transition as part of the mitigation that may support a medical hardship waiver request and additional eligibility.                                                                                                                                                                                                                                       | 8.1 (1.9)<br>88% |                  |
| 20. Regular review of NCAA TGNC policies and materials, and relevant research specific to TGNC participation in sport, by applicable NCAA committees and subcommittees for purposes of recommending updates that uphold NCAA core values around student-athlete inclusion, well-being, and fairness.                                                                              | 8.4 (1.6)<br>91% |                  |
| 21. Acknowledgement of gender identities that are neither male nor female (e.g., non-binary, nonconforming, genderqueer) in policies and practices related to TGNC athletes.                                                                                                                                                                                                      | 8.2 (1.7)<br>91% |                  |
| 22. Consideration of competitive equity in women's sport as part of all policy reviews and updates.                                                                                                                                                                                                                                                                               | 8.2 (1.3)<br>88% |                  |
| 23. Membership "tool kit" and/or "checklist" that provides athletics department personnel with relevant guidance, strategies and/or best practices related to supporting TGNC student-athlete well-being.                                                                                                                                                                         | 8.5 (1.2)<br>91% |                  |
| 24. Processes through which the membership "tool kit" and/or checklist will be updated regularly and made available to member institutions.                                                                                                                                                                                                                                       | 8.6 (1.1)<br>94% |                  |
| 25. Availability of TGNC inclusion resources to support institutions in their outreach efforts to various stakeholders about TGNC inclusion (e.g., to media, parents, high schools).                                                                                                                                                                                              | 8.4 (1.3)<br>94% |                  |
| 26. Guidance, strategies and/or best practices related to TGNC inclusion as part of Championship event procedures and materials (e.g., use of preferred names/pronouns, gender safe facilities).                                                                                                                                                                                  | 8.4 (1.1)<br>91% |                  |
| 27. Identification and promotion of opportunities designed to enhance peer support among TGNC student-athletes across campuses.                                                                                                                                                                                                                                                   | 8.5 (1.0)<br>91% |                  |
| 28. Identification and promotion of opportunities designed to increase positive visibility of TGNC student-athletes.                                                                                                                                                                                                                                                              | 8.1 (1.6)<br>88% |                  |
| 29. A multidisciplinary group of experts comprising, among others, student-athletes, industry experts, physicians and licensed mental health professionals with experience related to TGNC student-athlete support that may serve as an advisory body to NCAA governance groups, as they review association policies, materials and requests for input on TGNC topics and issues. | 8.8 (0.8)<br>97% |                  |

|                                                                                                                                                                  |                  |  |
|------------------------------------------------------------------------------------------------------------------------------------------------------------------|------------------|--|
| 30. TGNC student-athlete well-being: mental health; physical health; psychosocial experiences (e.g., team acceptance, isolation, experiences of discrimination). | 8.5 (1.1)<br>97% |  |
| 31. Competitive success of TGNC athletes across all levels of sport (i.e., high school, collegiate, international).                                              | 8.2 (1.5)<br>94% |  |
| 32. Experiences and perspectives of all student-athletes about gender identity and student-athlete participation.                                                | 8.3 (1.0)<br>94% |  |
| 33. Myths/misperceptions about TGNC student-athletes across all stakeholder groups.                                                                              | 8.0 (1.7)<br>94% |  |
| 34. TGNC student-athlete feedback about TGNC resource availability, utilization, barriers to utilization, and felt needs.                                        | 8.4 (1.2)<br>94% |  |

**Supplementary Table 2.** Concepts that may improve inclusion and/or well-being for NCAA TGNC student-athletes- *Round 2 results (n=33)*

| Action                                                                                                                                                                                                                                                                                                                                                                                                                                                                                                                                                                  | Utility<br>Mean (SD)<br>% $\geq 7$ | Feasibility<br>Mean (SD)<br>% $\geq 7$ |
|-------------------------------------------------------------------------------------------------------------------------------------------------------------------------------------------------------------------------------------------------------------------------------------------------------------------------------------------------------------------------------------------------------------------------------------------------------------------------------------------------------------------------------------------------------------------------|------------------------------------|----------------------------------------|
| <b>Institutional actions</b>                                                                                                                                                                                                                                                                                                                                                                                                                                                                                                                                            |                                    |                                        |
| 1. <i>(Revised statement 1 from Round 1)</i> Encouragement and incentivization of healthcare providers who work with student-athletes to participate in ongoing continuing education about patient-centered healthcare, and to apply these practices to the care of all student-athletes, including transgender and non-binary (TGNC) student-athletes, specifically noting that key elements of patient-centered care include understanding and respecting student-athlete identity, goals, and values, and having this guide a collaborative decision-making process. | 8.58 (0.79)<br>97%                 | 7.88 (1.29)<br>85%                     |
| 2. <i>(Revised statement 41 from Round 1)</i> Student-athlete options for gender-neutral uniforms, where possible, based on NCAA sport specific rules.                                                                                                                                                                                                                                                                                                                                                                                                                  | 8.09 (1.51)<br>85%                 | 7.42 (1.77)<br>67%                     |
| 3. <i>(Revised statement 16 from Round 1)</i> Institutional practices that provide safety and privacy in facilities (e.g., locker rooms, restrooms) for home and visiting teams.                                                                                                                                                                                                                                                                                                                                                                                        | 8.42 (1.23)<br>91%                 | 7.15 (1.73)<br>67%                     |

**Supplementary Table 3.** Participants in Summit on Gender Identity and Student-Athlete Participation. Note: individuals listed attended the Summit and were eligible to participate in strategy rating activities. NCAA staff members provided technical support for the Summit and consensus process but were not eligible to participate in strategy rating.

| Summit Steering Committee |                                                                                                                                                                                             |
|---------------------------|---------------------------------------------------------------------------------------------------------------------------------------------------------------------------------------------|
| Role                      | Representative                                                                                                                                                                              |
| Co-chair                  | Dr. Stephanie Chu, DO,<br>Team Physician, University of Colorado,<br>Boulder;<br>NCAA Committee on Competitive<br>Safeguards and Medical Aspects of Sport                                   |
| Co-chair                  | Dr. Mark Lombardi, PhD,<br>President, Maryville University of Saint<br>Louis;<br>NCAA Board of Governors Committee to<br>Promote Cultural Diversity and Equity                              |
| Steering Committee        | Dr. Kathryn Ackerman, MD, MPH, FACSM,<br>Harvard Medical School, Endocrinology and<br>Sports Medicine; Director – Female Athlete<br>Program, Boston Children’s Hospital, Sports<br>Medicine |
| Steering Committee        | Dr. Mac Brown, Psy.D, LP, CMPC,<br>Assistant Director, Training Coordinator for<br>the Psychological Health and Performance<br>Team, University of Colorado, Boulder<br>Athletic Department |
| Steering Committee        | Dr. Pat Griffin, EdD,<br>Professor Emerita, University of<br>Massachusetts, Amherst                                                                                                         |
| Steering Committee        | Dr. Jeremy Henrichs, MD, CAQSM,<br>Carle Orthopedics and Sports Medicine;<br>Team Physician, University of Illinois;<br>American Medical Society for Sports<br>Medicine                     |
| Steering Committee        | Chris Mosier, MA,<br>Founder of Transathlete.com                                                                                                                                            |

  

| National and International Organizations            |                      |
|-----------------------------------------------------|----------------------|
| Organization                                        | Representative       |
| American Orthopaedic Society for Sports<br>Medicine | Dr. Benjamin Ma      |
| American Osteopathic Academy of Sports<br>Medicine  | Dr. Jeffrey Bytowski |
| American Physical Therapy Association               | Dr. Erik Meira       |

Summit on Gender Identity  
and Student-Athlete Participation Participants  
October 2020  
Page No. 6

|                                                    |                       |
|----------------------------------------------------|-----------------------|
| American Psychological Association Division 47     | Dr. Doug Hanks        |
| Athlete Ally                                       | Hudson Taylor         |
| Athlete Ally                                       | Anne Lieberman        |
| Clinical & Counseling Sport Psychology Association | Dr. Chris Bader       |
| College Athletic Trainers Society                  | Elizabeth Zanolli     |
| College Football Parents 24/7                      | Mya Hinton            |
| Endocrine Society                                  | Dr. Brad Anawalt      |
| Faculty Athletics Representatives Association      | James Crawley         |
| Higher Education Mental Health Alliance            | Dr. Leigh White       |
| International Olympic Committee                    | Dr. Richard Budgett   |
| International Society for Sports Psychiatry        | Dr. Todd Stull        |
| Lambda Legal                                       | Carl Charles          |
| National Athletic Trainers Association             | Dr. Rebecca Lopez     |
| National Center for Lesbian Rights                 | Helen Carroll         |
| National Center for Lesbian Rights                 | Shannon Minter        |
| National Center for Transgender Equality           | Rodrigo Heng-Lehtinen |
| The Inclusion Playbook                             | Ashland Johnson       |
| The Trevor Project                                 | Casey Pick            |
| United States Department of Defense                | Dr. Donald Shell      |
| United States Olympic and Paralympic Committee     | Dr. Jonathan Finnoff  |
| WeCOACH                                            | Megan Kahn            |
| Women's Sports Foundation                          | Sarah Axelson         |

| NCAA Membership                                                        |                 |
|------------------------------------------------------------------------|-----------------|
| Membership Affiliation                                                 | Representative  |
| NCAA Board of Governors Student-Athlete Engagement Committee           | Bryce Choate    |
| Big Sky Conference, Senior Associate Commissioner                      | Jayne Nadolski  |
| Brandeis University, Athletics Director                                | Lauren Haynie   |
| NCAA Committee on Competitive Safeguards and Medical Aspects of Sports | Dr. James Houle |
| NCAA Committee on Competitive Safeguards and Medical Aspects of Sports | Kim Terrell     |
| NCAA Committee on Women's Athletics                                    | Renee Bostic    |
| NCAA Division III LGBTQ Working Group                                  | Mika Costello   |
| NCAA Division III LGBTQ Working Group                                  | Emet Marwell    |
| NCAA Division III LGBTQ Working Group                                  | Neil Virtue     |

Summit on Gender Identity  
and Student-Athlete Participation Participants  
October 2020  
Page No. 7

|                                                                                                                |                    |
|----------------------------------------------------------------------------------------------------------------|--------------------|
| NCAA Division II Student-Athlete Advisory Committee                                                            | John Etheridge     |
| NCAA Division II Student-Athlete Advisory Committee                                                            | Madeleine McKenna  |
| NCAA Division III Student-Athlete Advisory Committee                                                           | Carlie Hansen      |
| NCAA Division III Student-Athlete Advisory Committee                                                           | Mercy Ogutu        |
| NCAA Cross Country Student-Athlete                                                                             | Jordan Dawson      |
| NCAA Swimming Student-Athlete                                                                                  | Dani Wheeler       |
| Former NCAA Cross Country Student-Athlete                                                                      | Juniper Eastwood   |
| Former NCAA Swimming Student-Athlete                                                                           | Natalie Fahey      |
| Former NCAA Track & Field Student-Athlete                                                                      | Linnea Saltz       |
| NCAA Gender Equity Task Force                                                                                  | Judy Sweet         |
| Franklin Pierce University, Associate Athletic Director and Senior Woman Administrator                         | Jeannette McKillop |
| NCAA Division I Governance                                                                                     | Noreen Morris      |
| NCAA Division II Governance                                                                                    | Julie Ruppert      |
| NCAA Division III Governance                                                                                   | Michelle Walsh     |
| Houghton College, National Director of Athletics Engagement                                                    | Skip Lord          |
| NCAA Minority Opportunities and Interests Committee                                                            | Marquetta Dickens  |
| Penn State University, Professor of Kinesiology                                                                | Dr. Jaime Schultz  |
| Simon Fraser University, Professor of Sociology, co-editor of Transgender Athletes in Competitive Sport (2017) | Dr. Travers        |
| SUNY New Paltz, Head Cross Country Coach                                                                       | Aislinn Ryan       |
